# Supplementary material
Source: PubMed Central journal article supplement (PMC3296122)
Supplement: Supp_Data.pdf [file Supp_Data.pdf]

## Supplementary Data

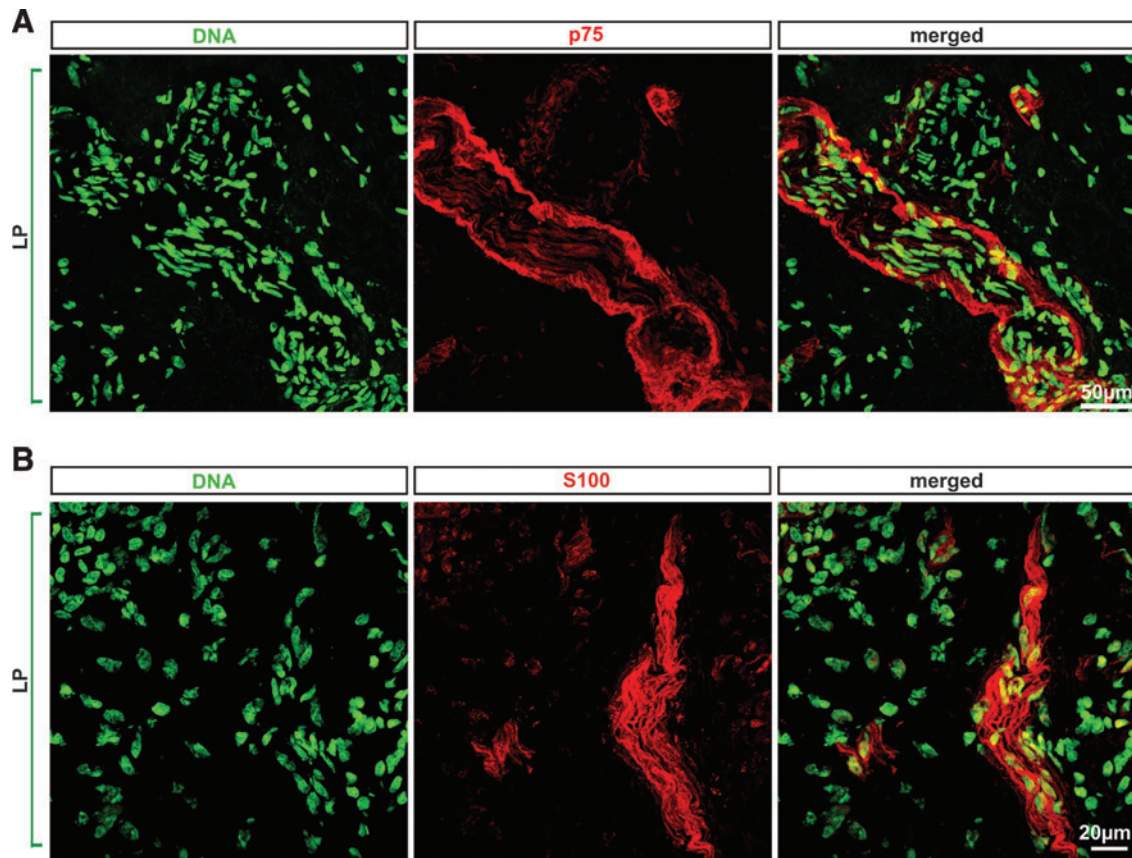

**SUPPLEMENTARY FIG. S1.** Immunocytochemical stainings of sections against the neural crest marker p75<sup>NTR</sup> and S100. **(A, B)** p75<sup>NTR+</sup> and S100<sup>+</sup> cells were exclusively observable within the lamina propria (LP). Binding of primary antibodies was visualised by appropriate secondary fluorochrome-coupled antibodies (*red*). Nuclei were stained with SYTOX Green. Scale bar: A = 20  $\mu$ m/B = 50  $\mu$ m.

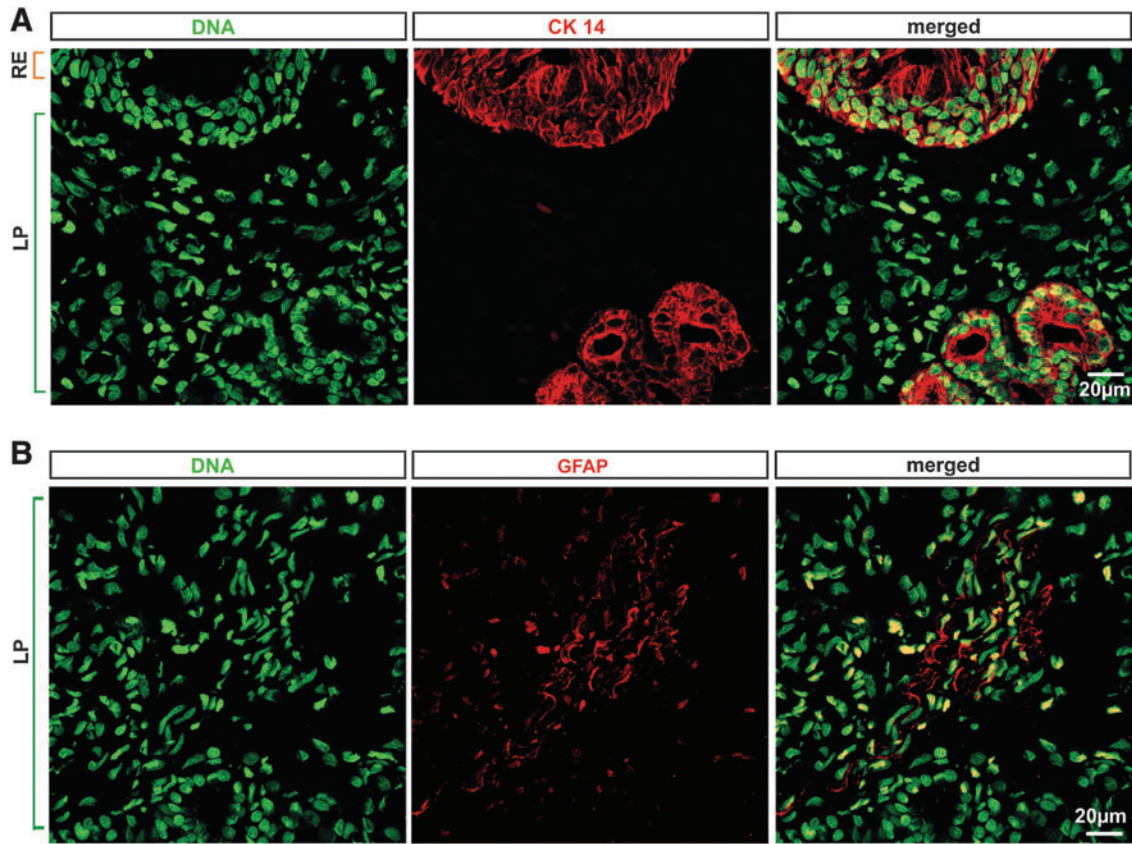

**SUPPLEMENTARY FIG. S2.** Immunocytochemical stainings of sections against the epithelial marker cytokeratin 14 (CK 14) and the intermediate filament glial fibrillary acidic protein (GFAP). **(A)** CK 14 expression (*red*) was detected in basal cells within the epithelial layer (RE) and in glands within the LP. Scale bar: 20 μm. **(B)** GFAP-positive cells (*red*) were exclusively detected within the LP and not in the RE. Nuclei were stained with SYTOX Green. Scale bar: 20 μm.

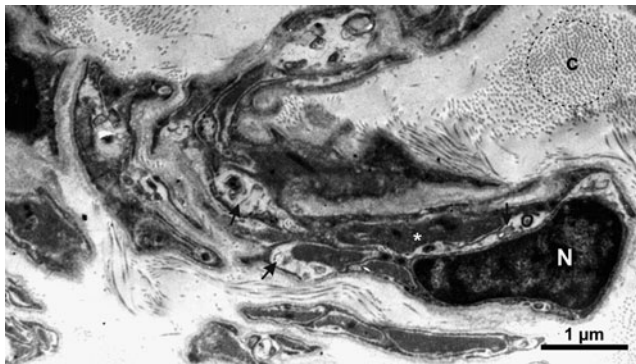

**SUPPLEMENTARY FIG. S3.** Isotype control of transmission electron microscopy of nanogold silver-intensified particles. Only irregularly dispersed particles were visible. Nerve fibers and collagen fibers (c) were detectable. Arrows indicating axons closely related to nonmyelinating Schwann cells (*asterisk*). N = nucleus. Scale bar: 1 μm.

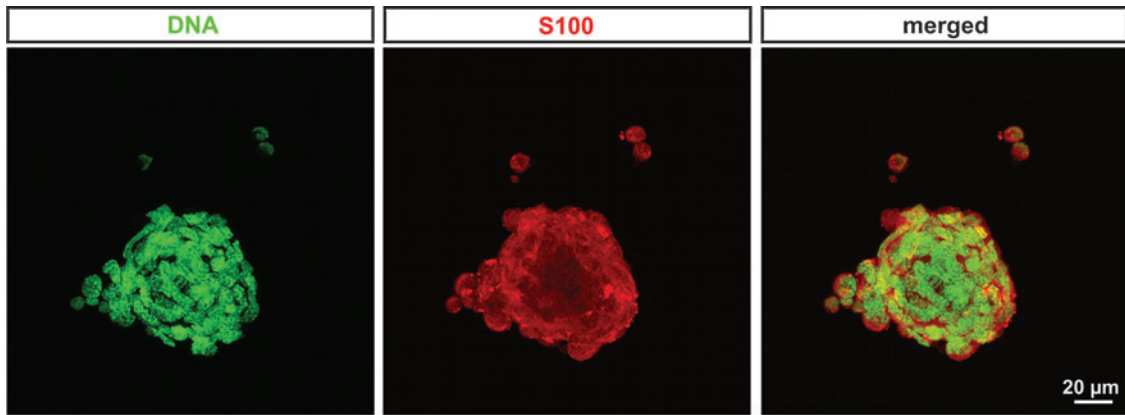

**SUPPLEMENTARY FIG. S4.** Immunocytochemical staining of neurospheres against S100 (*red*), showed its expression in almost all cells within a neurosphere. Nuclei were stained with SYTOX *Green*. Scale bar: 20μm.



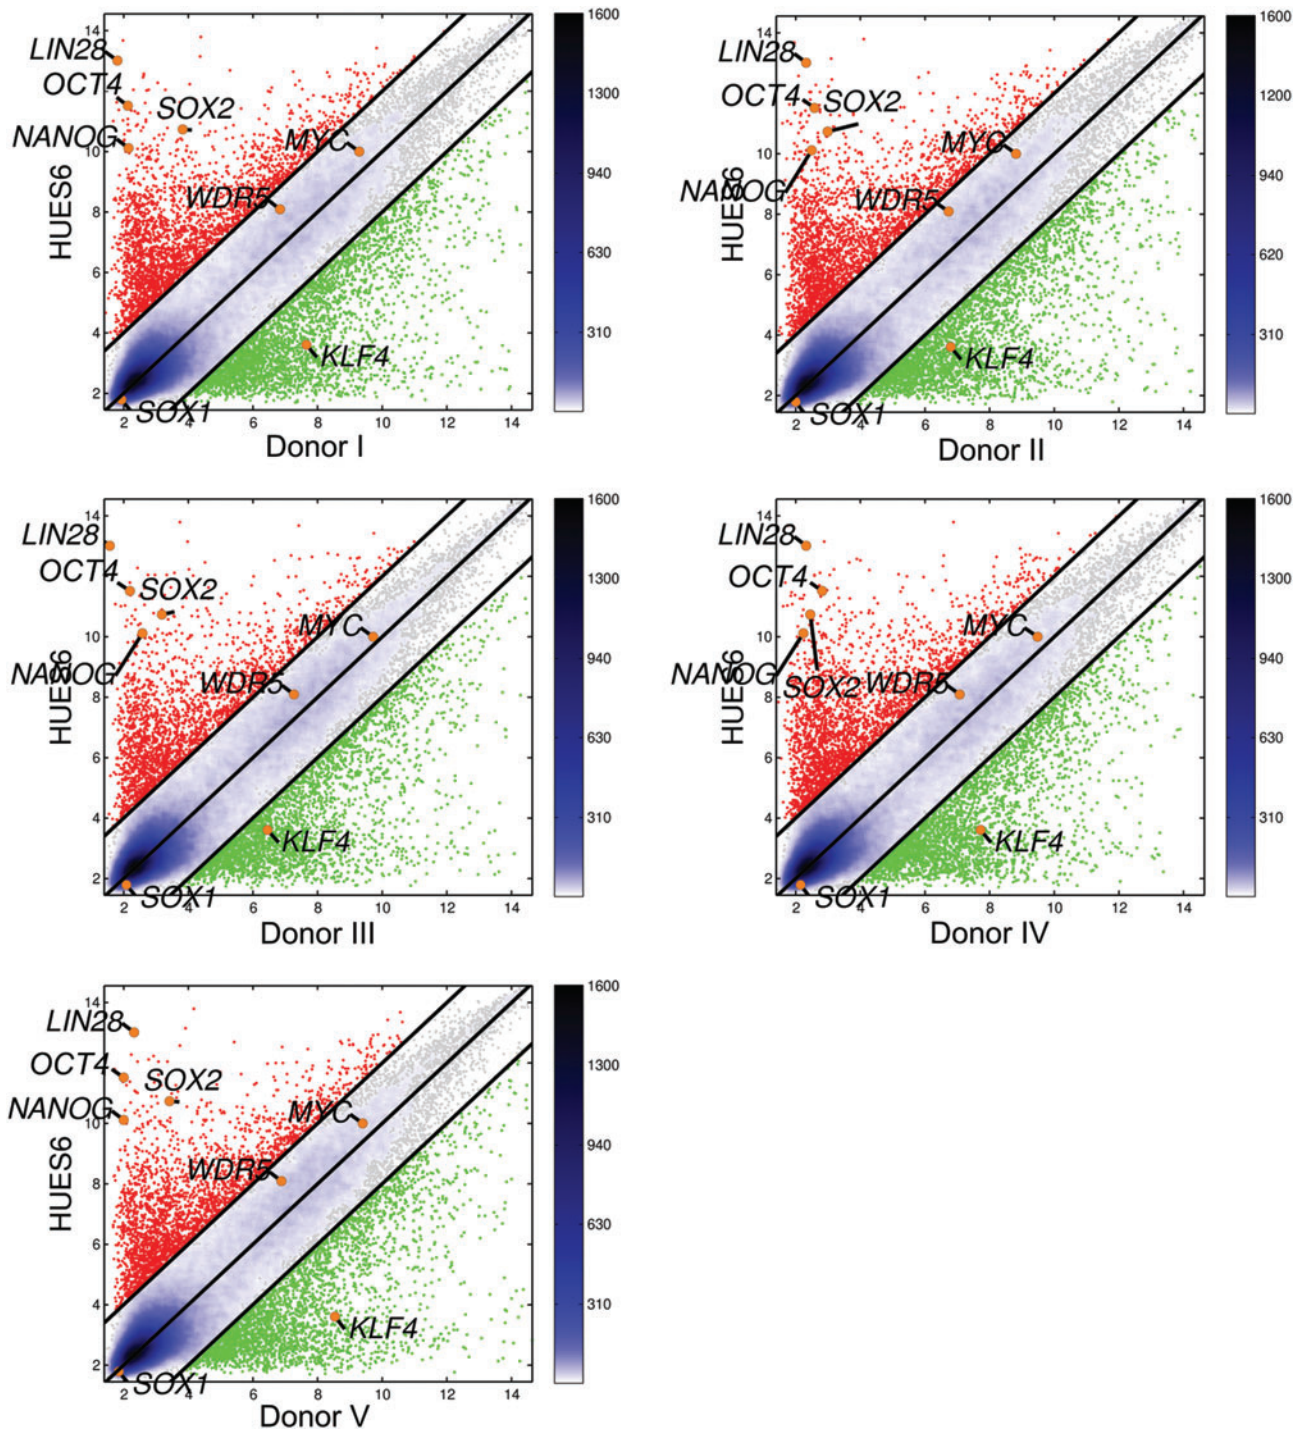

**SUPPLEMENTARY FIG. S5.** Microarray scatter plots of 5 different ITSCs donors compared with HUES6. All 5 donors showing comparable expression patterns of pluripotency associated genes. WDR5, KLF4, and c-MYC were expressed at least at the same level compared to hESCs, while OCT4, SOX2, LIN28, and NANOG were lower expressed. ITSCs, inferior turbinate stem cells.

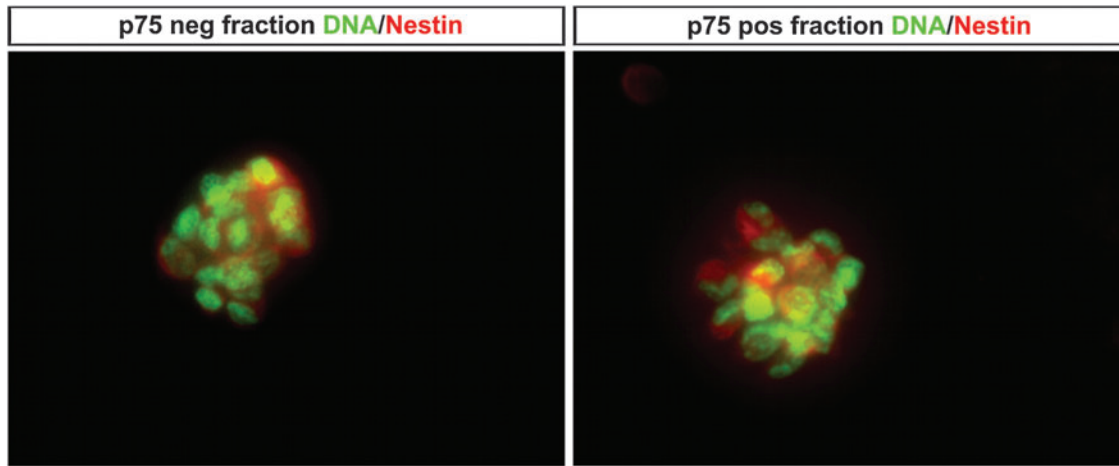

**SUPPLEMENTARY FIG. S6.** Immunocytochemical staining of p75<sup>+</sup> and p75<sup>-</sup> sorted neurospheres against nestin. Nestin expression was detectable in both fractions, demonstrating a neural crest-related stem cell population. Nuclei were stained with SYTOX Green.

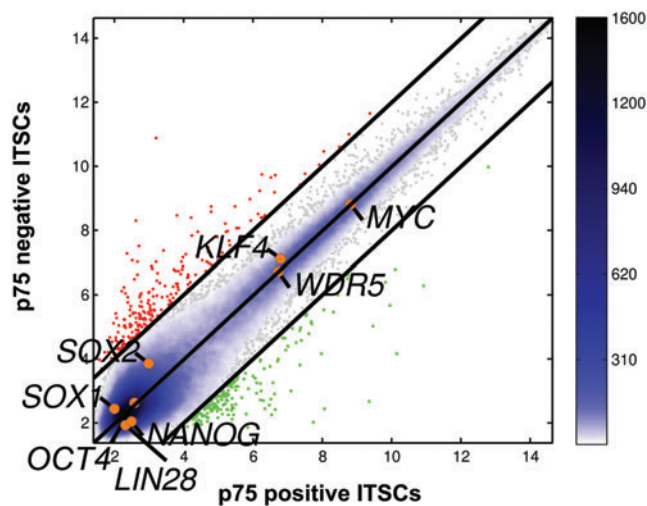

**SUPPLEMENTARY FIG. S7.** Whole genome comparison between p75<sup>+</sup> and p75<sup>-</sup> sorted ITSCs. No differences in the expression of pluripotency associated genes was detectable. ~400 genes in the p75<sup>+</sup> sorted cells were up- or down-regulated compared with p75<sup>-</sup> sorted cells.

SUPPLEMENTARY TABLE S1. PRIMER SEQUENCES  
USED FOR THE PCR-ANALYSIS

| <i>Target</i>             | <i>Sequence (5'-3')</i>  |
|---------------------------|--------------------------|
| ABCG2                     | caaaaactgctgggtaatc      |
| Rev-ABCG2                 | acagaaccacactctgacc      |
| $\beta$ -Actin            | gagaagatgaccagatcatgt    |
| Rev- $\beta$ -Actin       | catctctgctcgaagtcag      |
| AMPA1                     | ggcgataattcaagtgtca      |
| Rev-AMPA1                 | ggctccgtattttccatcac     |
| CD133                     | caccgctctagatactgctgtga  |
| Rev-CD133                 | tgatggaccatggacataaacgtg |
| c-Myc                     | aggagacatggtaaccagagt    |
| Rev-c-Myc                 | agcctgcctctttccacagaac   |
| CNPase                    | ggcagaggagtacgtcaac      |
| Rev-CNPase                | aggtttgctttcccgtagt      |
| GABA transporter          | cagtgaggatgtccttctct     |
| rev- GABA transporter     | caggggtcatgatcatccag     |
| Klf4                      | tctcaattcgctgaccatcct    |
| Rev-Klf4                  | ttcagcacgaactgcccacatca  |
| Nanog                     | tgcttattcaggacagccct     |
| Rev-Nanog                 | tctggtcttctgttcttgact    |
| Nestin                    | cagcgttggacagaggttg      |
| Rev-Nestin                | gctggcacaggtgtctcaag     |
| NMDA1                     | gctcctcgagaaggagaaca     |
| Rev-NMDA1                 | gccattgtagatgccactt      |
| Oct4A                     | tcccttcgcaagccctcat      |
| Rev-Oct4A                 | tgatgtctctgggactcctc     |
| Oct4A/B                   | ctcctgaagcagaaggatcac    |
| Rev-Oct4A/B               | cttctggcgccggttacagaaca  |
| p75/CD271                 | tgagtgtgcaaagcctgcaa     |
| Rev-p75/CD271             | tctcatcctggtagtagccgt    |
| Slug                      | caactacagcgaactggacacaca |
| Rev-Slug                  | aaagccttgccacagatcttgc   |
| Sox2                      | tgcagtacaactccatgacca    |
| Rev-Sox2                  | gtgctgggacatgtgaagtct    |
| Sox9                      | tgaagaaggagagcgaggaa     |
| Rev-Sox9                  | ggggctgggtacttgaatcg     |
| Sox10                     | aggagaaggaggttgactgt     |
| Rev-Sox10                 | tcctcaaagctactctcagc     |
| Synaptophysin             | tgtagtctggctcagtgaaacc   |
| Rev-Synaptophysin         | gcagggctcagacagataaa     |
| $\beta$ -III-tubulin      | cattctgggtggacctggaac    |
| Rev- $\beta$ -III-tubulin | tcgcagttttcacactccttc    |
